# Supplementary material
Source: publisher figshare collection journal article supplement (https://springernature.figshare.com/ndownloader/files/22839425)
Supplement: Supplementary file [file 22839425]

**What is your role or designation on the RRT team? (please circle)**

ICU Registrar      Medical Registrar      Intern      RRT Nurse      Duty Nurse Coordinator

**Number of years in clinical practice? ..... Number of years on RRT? .....**

| Question                                                                    | Strongly agree | Agree | Neutral | Disagree | Strongly disagree |
|-----------------------------------------------------------------------------|----------------|-------|---------|----------|-------------------|
| <b>Currently, when the RRT team arrives</b>                                 |                |       |         |          |                   |
| RRT members introduce themselves to ward staff                              |                |       |         |          |                   |
| It is obvious who is the team leader at RRT calls                           |                |       |         |          |                   |
| I understand my role as part of the RRT team                                |                |       |         |          |                   |
| I understand my responsibilities as part of the RRT team                    |                |       |         |          |                   |
| The Team Leader delegates roles appropriately                               |                |       |         |          |                   |
| I understand the roles of other members of the RRT call team                |                |       |         |          |                   |
| I understand the responsibilities of other members of the RRT team          |                |       |         |          |                   |
| The RRT team always receives a handover from the ward team                  |                |       |         |          |                   |
| Question                                                                    | Strongly agree | Agree | Neutral | Disagree | Strongly disagree |
| <b>Over the past year, my experiences during RRT calls are</b>              |                |       |         |          |                   |
| Other members of the RRT listen to and address my queries and concerns      |                |       |         |          |                   |
| The RRT involves ward staff during development of the clinical plan         |                |       |         |          |                   |
| The RRT team communicates well with other staff                             |                |       |         |          |                   |
| Ward staff who call the RRT are reluctant to be involved during calls       |                |       |         |          |                   |
| Attending teams are reluctant to be involved during calls on their patients |                |       |         |          |                   |
| I have witnessed conflicts during calls                                     |                |       |         |          |                   |

| Question                                                                                                         | Strongly agree | Agree | Neutral | Disagree | Strongly disagree |
|------------------------------------------------------------------------------------------------------------------|----------------|-------|---------|----------|-------------------|
| <b>At the completion of the RRT call</b>                                                                         |                |       |         |          |                   |
| The RRT should handover to ward staff before leaving                                                             |                |       |         |          |                   |
| The RRT should not leave until they have an agreed plan with ward staff                                          |                |       |         |          |                   |
| Question                                                                                                         | Strongly agree | Agree | Neutral | Disagree | Strongly disagree |
| <b>Over the past year, my perceptions are</b>                                                                    |                |       |         |          |                   |
| Communication skills are important during RRT calls                                                              |                |       |         |          |                   |
| The RRT team works well together                                                                                 |                |       |         |          |                   |
| Question                                                                                                         | Strongly agree | Agree | Neutral | Disagree | Strongly disagree |
| <b>Please rate the following suggestions to help the RRT team improve performance:</b>                           |                |       |         |          |                   |
| Meet at the start of a shift to introduce team members and establish the team leader and other team member roles |                |       |         |          |                   |
| Have a debrief at the conclusion of every RRT call                                                               |                |       |         |          |                   |
| Receive a handover from the previous shift RRT team                                                              |                |       |         |          |                   |
| Follow-up all RRT calls during a shift before the team goes off duty                                             |                |       |         |          |                   |
| Hold regular hospital-wide audit for all patients attended by RRT                                                |                |       |         |          |                   |
| Participate in team-work and communication skills training                                                       |                |       |         |          |                   |
| Participate in simulated RRT scenario training                                                                   |                |       |         |          |                   |

**Do you have other suggestions that would help the RRT team improve their performance?**

---

---

---

---

---

---

---

---

---

---
